# Supplementary material
Source: publisher site journal article supplement (https://www.spandidos-publications.com/8673/downloadSupplementary)

Figure S1. The exonic circRNA *FECR1-FLII* positive feedback loop in glioma cells. (A) Upregulation of *FLII* by its exonic circRNA *FECR1* through a positive feedback mechanism. Exonic circRNA *FECR1* is formed by back splicing of *FLII* exon 4 to exon 2. After binding to the *FLII* promoter, exonic circRNA *FECR1* recruits TET1 demethylase and induces DNA demethylation in the promoter CpG islands. Additionally, exonic circRNA *FECR1* also inhibits DNA methyltransferase DNMT1 to induce DNA methylation. Using this positive feedback mechanism, exonic circRNA *FECR1* regulates *FLII* transcription in tumors [11]. (B) Exonic circRNA *FECR1* expression in U87MG cells. Exonic circRNA *FECR1* is formed by back splicing of *FLII* exons E4-E2-E3. The back splicing site of exonic circRNA *FECR1* was verified by reverse transcription-quantitative PCR sequencing. (C) RNA fluorescence in situ hybridization (FISH) for exonic circRNA *FECR1*. Nuclei were stained with DAPI. 18S as control. Scale bar, 10  $\mu$ m. BF, bright-field.

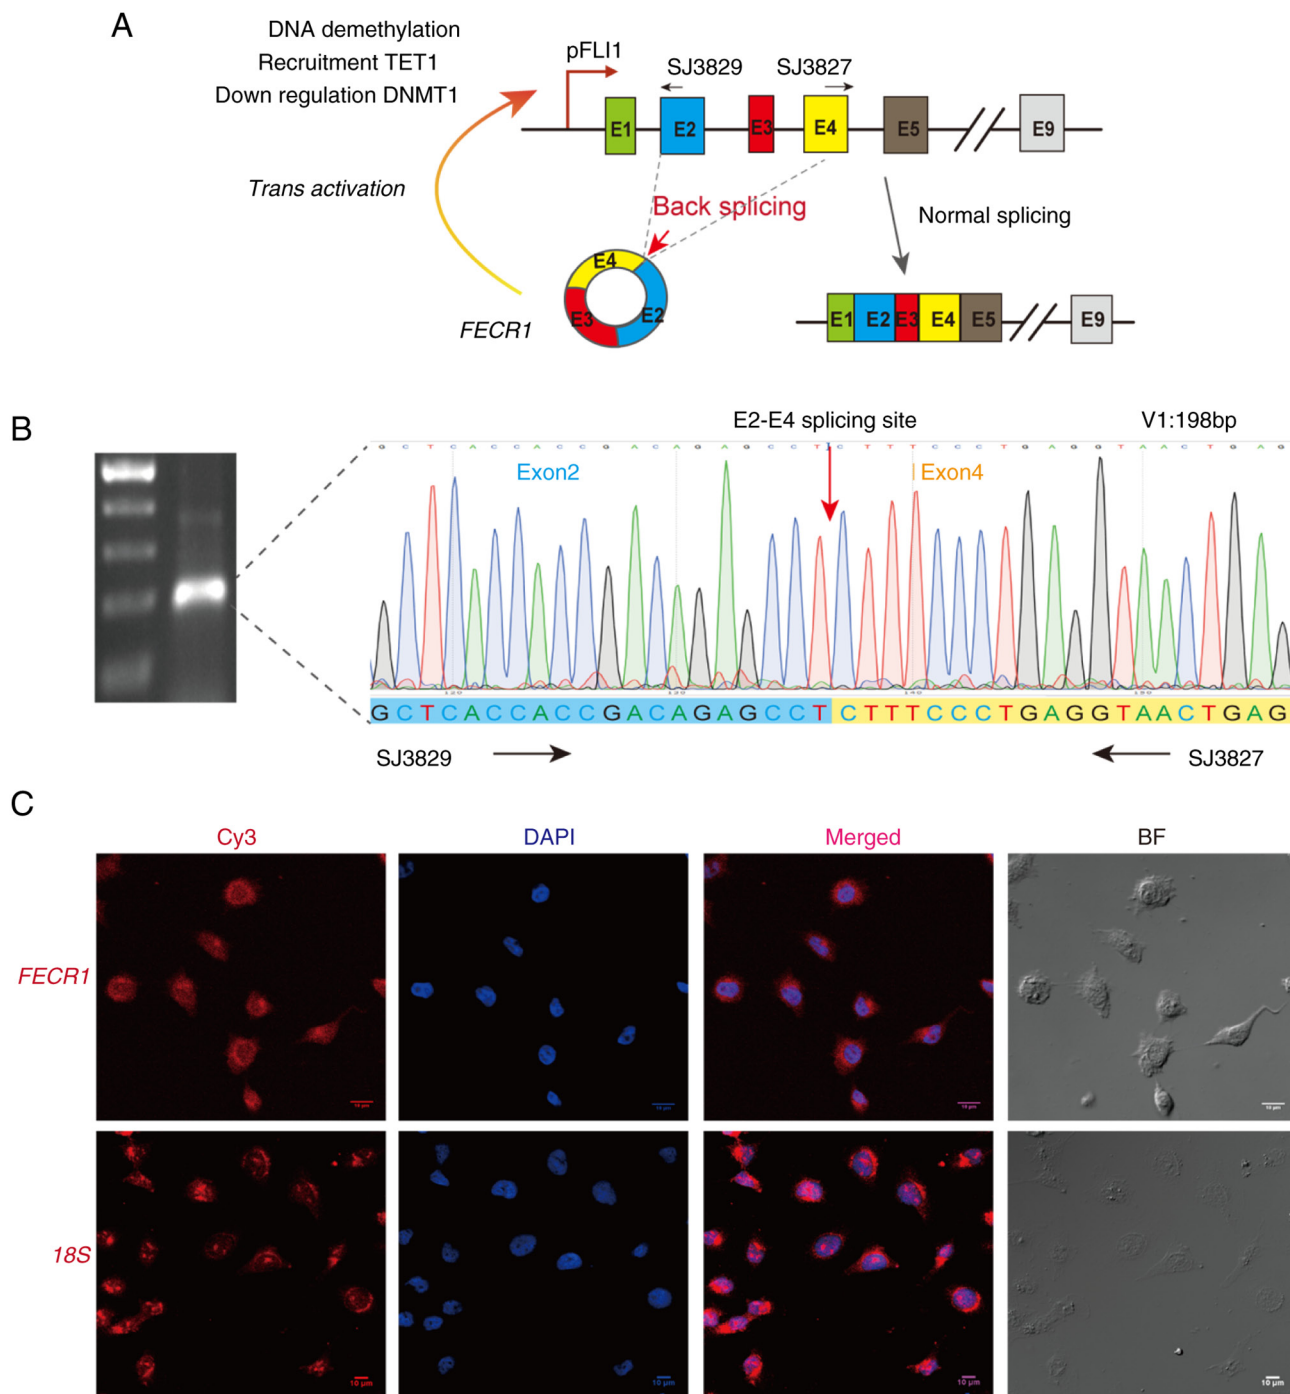

Figure S2. Exonic circRNA *FECR1* upregulates *FLI1* in glioma cells. (A) Location of PCR primers used for exonic circRNA *FECR1* binding *FLI1* (top). Binding of exonic circRNA *FECR1* in the *FLI1* locus (bottom). Two primer sets P1, P2 and E1 was used to quantitate *FLI1* in promoter and exon 1 of *FLI1*. The primer set 5'Ctl for the promoter upstream site was used as the negative control. Exonic circRNA *FECR1* was (B) overexpressed and (C) knocked down in U87MG cells. Reverse transcription PCR was performed to quantitate the exonic circRNA *FECR1* and *FLI1* expression level (Left). Error bars represent the standard error of the average of three independent PCR reactions. \* $P < 0.05$ , \*\*\* $P < 0.001$  as compared with CTL. The abundance of *FLI1* protein was assessed by western blotting (Right). CTL, control; OE, overexpression; sh, short hairpin.

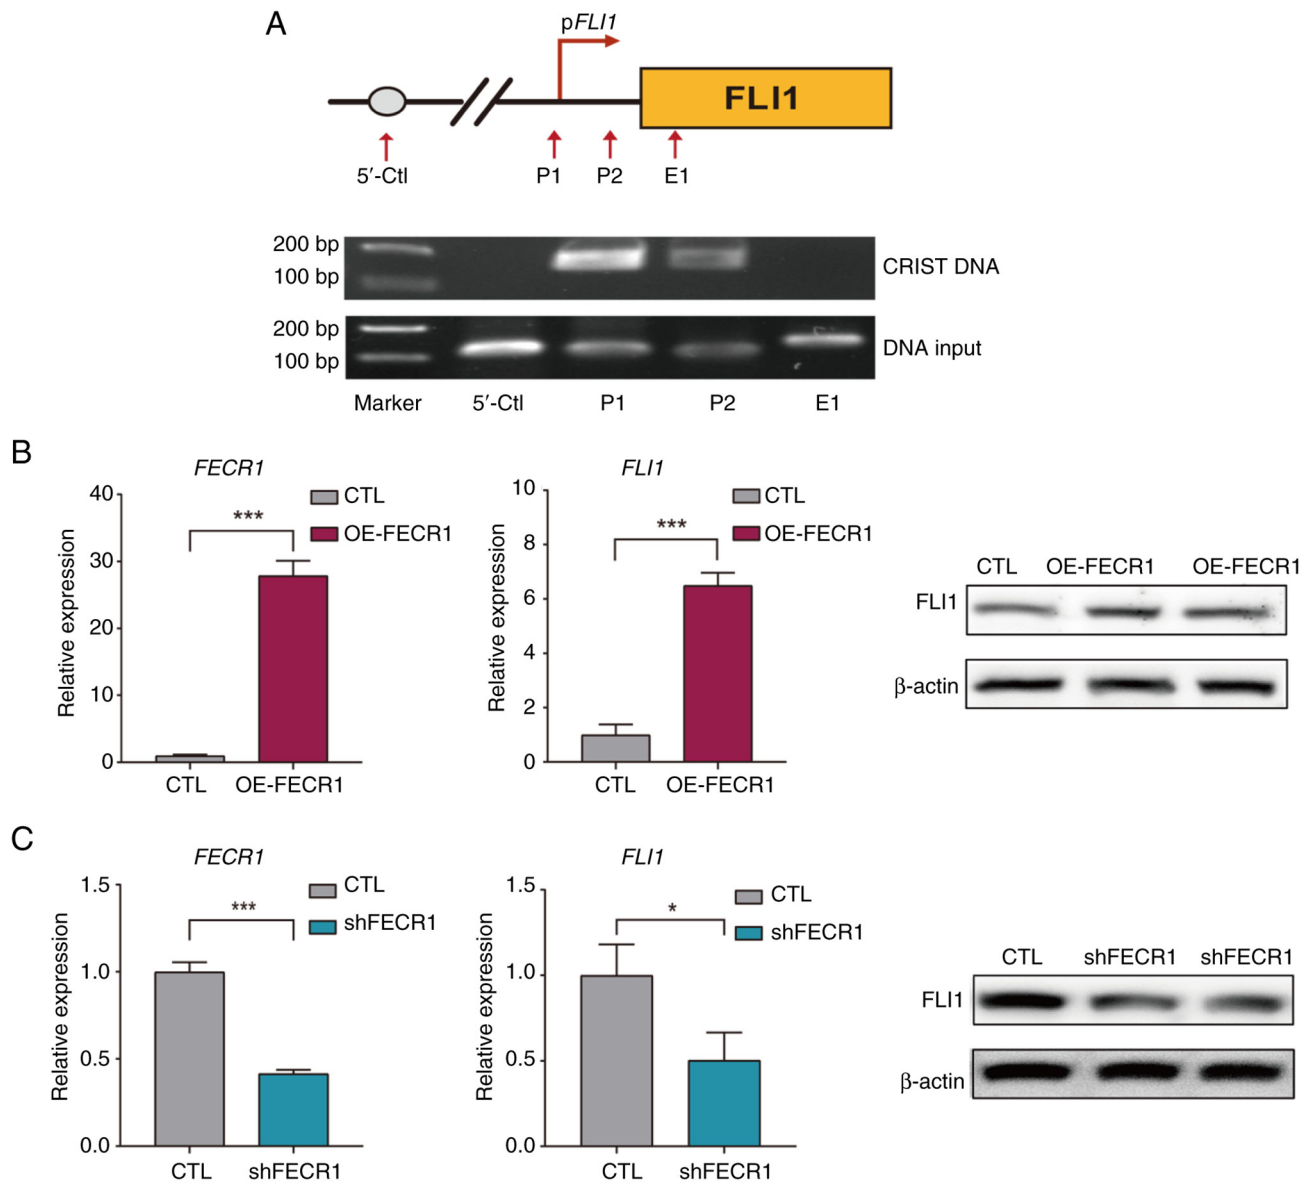

Figure S3. Cas9 *FLI1* knockdown affects tumor phenotypes in glioma cells. (A) *FLI1* protein was assessed by western blotting in Cas9 *FLI1* knockdown glioblastoma cells. *FLI1* was knocked down using Cas9 *FLI1* gRNA in U87MG and U251MG cells. (B) Cas9 *FLI1* cell proliferation was determined using the Cell Counting Kit 8 assay. (C) Cas9 *FLI1* tumor sphere colonies as measured by colony-forming assay. Cell colonies were stained on day 21. (D) Quantitation of tumor sphere colonies. \*\*\* $P < 0.001$  as compared with the CTL. (E) Viability of cells after *FLI1* knockdown by Cas9 *FLI1* gRNA in U87MG and U251MG cells. (F) Quantitation of the apoptotic cells and necrotic cells. \*\* $P < 0.01$ , \*\*\* $P < 0.001$  as compared with the CTLs. CTL, vector control cells.

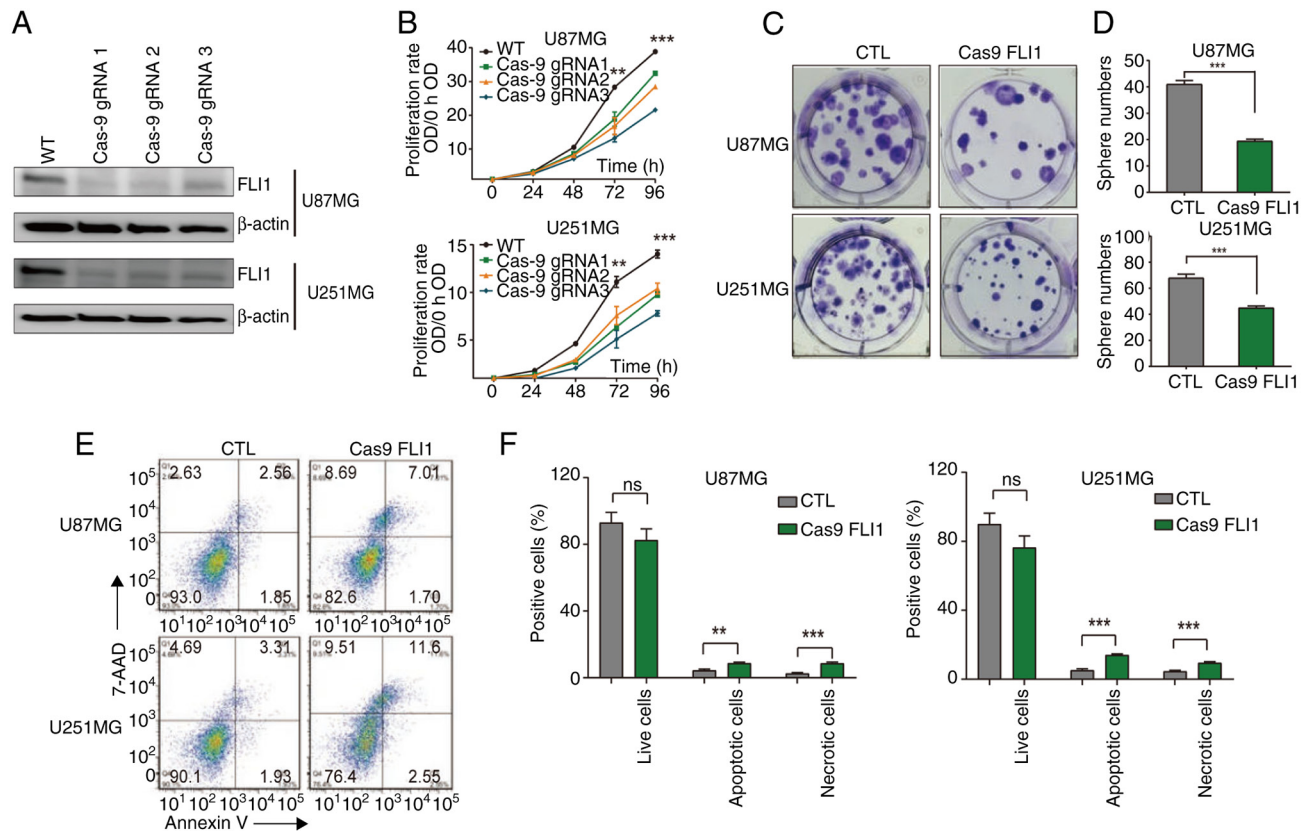

Figure S4. *ISG15* stabilizes *FLI1* in glioma cells using a positive feedback mechanism. (A) Fluorescent microscope image showing the subcellular localization of GFP-*FLI1* and *ISG15*; DAPI was used to stain the nucleus. (B) Representative western blots for *FLI1* and *ISG15* immunoprecipitated by *FLI1*-specific, *ISG15*-specific and immunoglobulin G (IgG: negative control) antibodies. (C) *ISG15* was knocked down using sh*ISG15* in U87MG. Reverse transcription quantitative PCR was performed to quantitate the *ISG15* and *FLI1* mRNA expression level. Error bars represent the standard error of the average of three independent PCR reactions. \*\*\* $P < 0.001$  as compared with CTL. ns: Not statistically significant. (D) The abundance of *FLI1* and *ISG15* protein was assessed by western blotting. Note, *FLI1* transcript levels were not affected after *ISG15* knockdown, while translation levels were significantly lower. (E) *FLI1*-Flag was co-expressed with HA-ubiquitin in 293T cells. Cell lysates were lysed in denaturing protein extraction buffer, followed by immunoprecipitation with mouse Flag antibodies. The immunoprecipitates and cell lysates were detected with rabbit Flag antibodies and HA antibodies. (F) A cycloheximide (CHX) chase assay for *FLI1* expression in U87MG cells. CTL, vector control cells; sh, short hairpin; WCL, whole cell lysate. BF, bright-field.

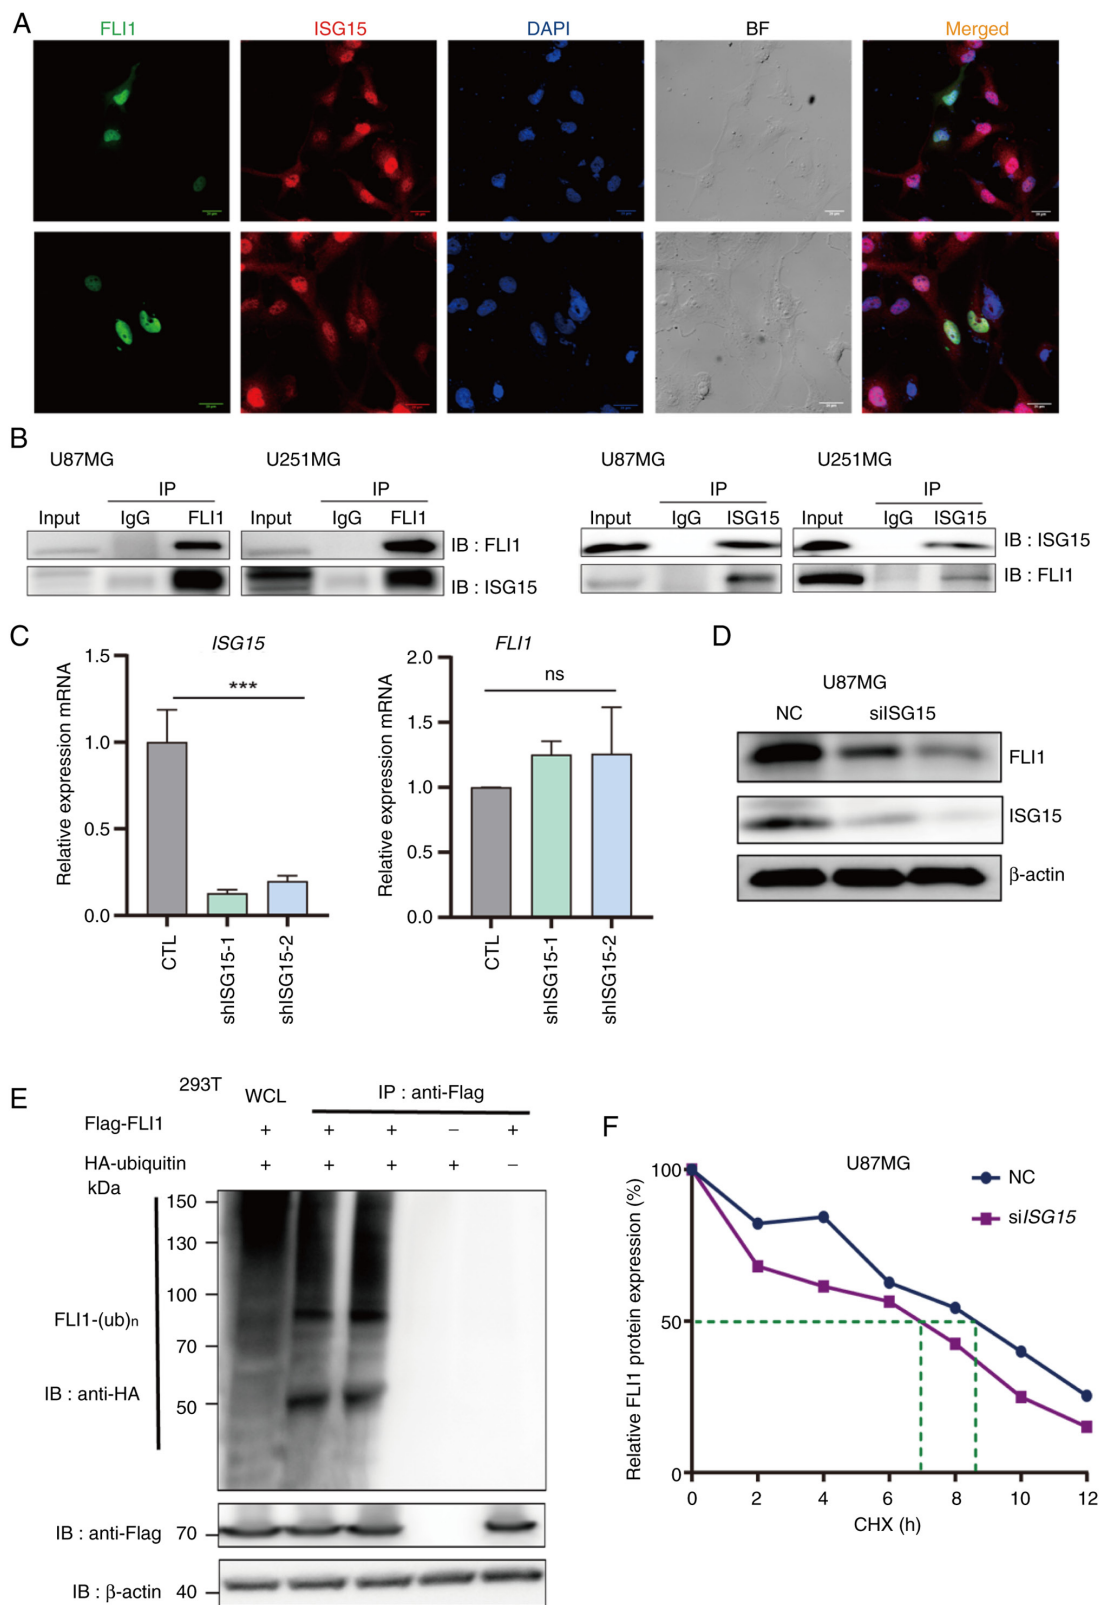

Figure S5. *ISG15* is associated with the development of glioma. (A) *ISG15* was highly expressed in glioma compared with normal brain specimens ( $P < 0.05$ ). (B) Histological grade of glioma. The expression level of *ISG15* was positively correlated with the histological grade of gliomas. One-way ANOVA demonstrated that *ISG15* levels varied significantly among the different histological grades ( $P = 1.3 \times 10^{-17}$ ). (C) *ISG15* expression in *IDH* mutation and *IDH* wild-type cells. One-way ANOVA showed a highly significant difference in *ISG15* levels between the two groups ( $P = 6.7 \times 10^{-13}$ ). (D) *ISG15* expression in *1p/19q* co-deletion and Non-codel cells. *ISG15* levels were significantly lower in the *1p/19q* co-deletion group compared with the Non-codel group ( $P = 3.1 \times 10^{-15}$ ). (E) Overall survival. Elevated *ISG15* expression was associated with reduced OS ( $P = 0.0001$ ). (F) Overexpression of *ISG15* in glioma tissues. *ISG15* expression was quantitated by immunohistochemical staining and was evaluated as the expression score. Red arrow: Dark brown immunohistochemical staining of *ISG15* oncoprotein. \* $P < 0.05$  in IV glioma tissues as compared with II/III glioma tissues. Scale bar, 200  $\mu\text{m}$ . The gene expression data in Fig. S5A were generated from the GEPIA web server <http://gepia.cancer-pku.cn/index.html>. Histological grade, molecular features and survival data in Figures S5B-S5E were retrieved from Chinese Glioma Genome Atlas <https://www.cgga.org.cn/index.jsp>. NTC, non-tumoral controls; T, tumors; N, number, *IDH*, isocitrate dehydrogenase.

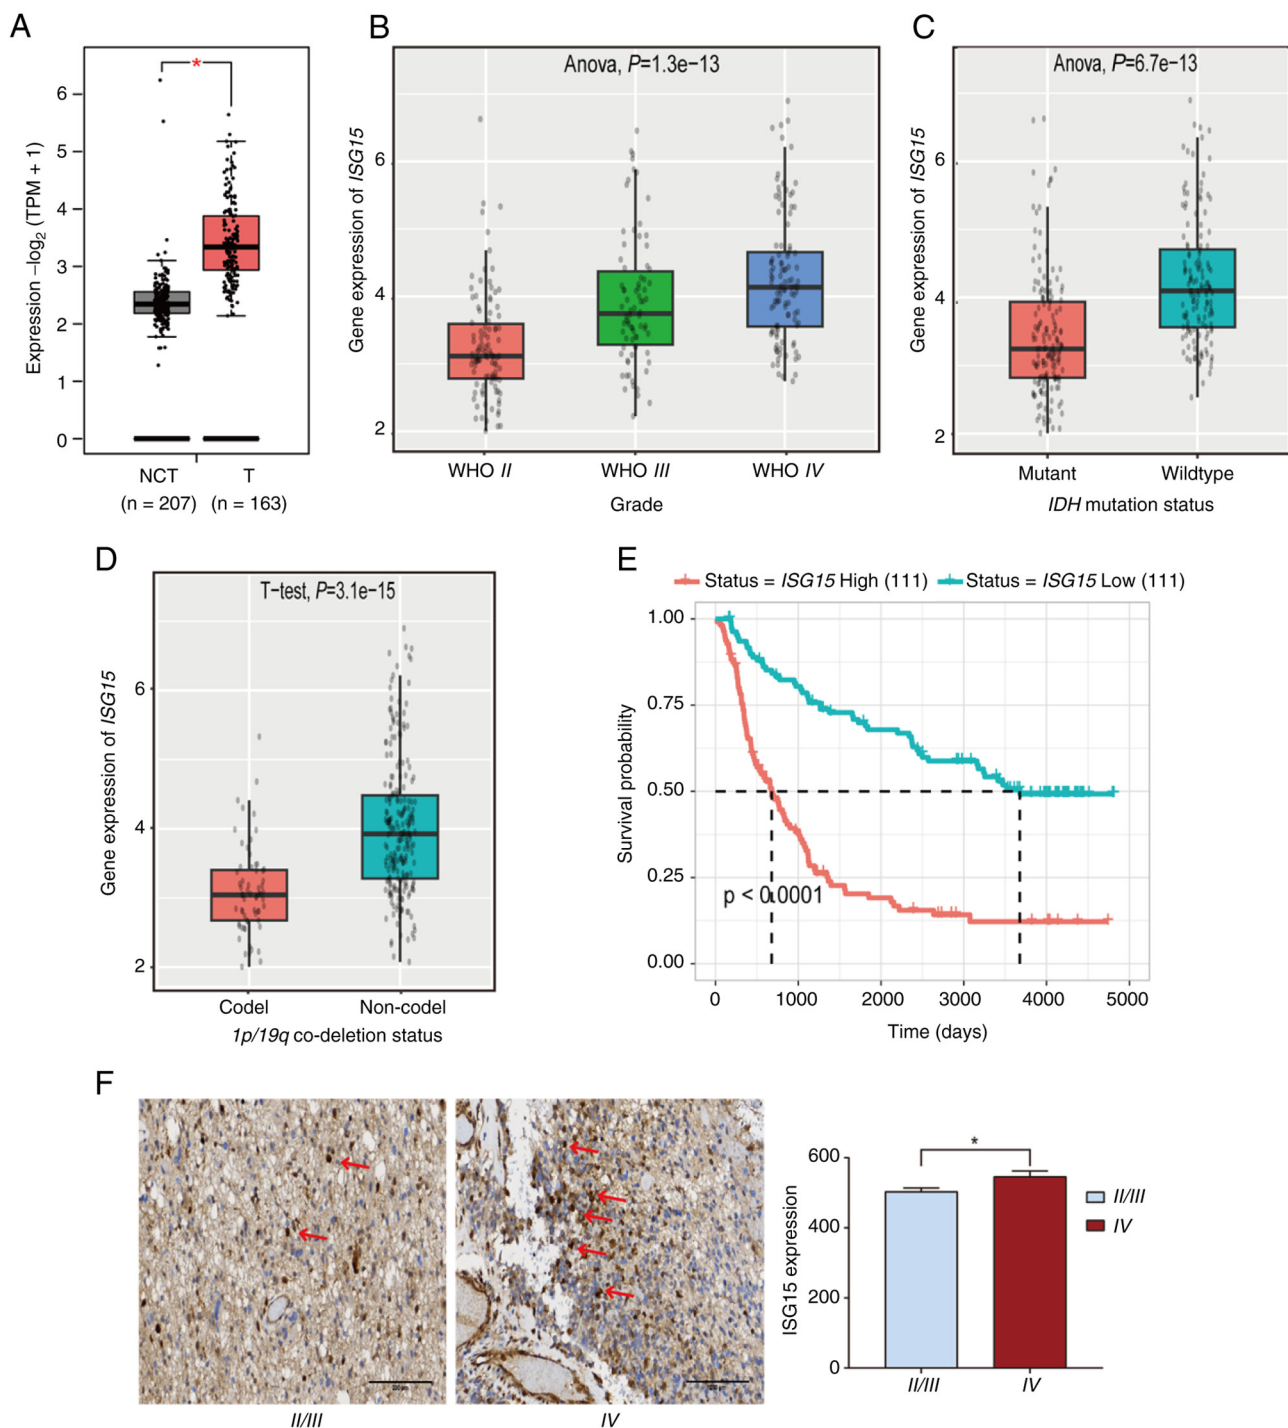

Figure S6. *FLI1* binds to the *BCL2* promoter. (A) Location of PCR primers used for *FLI1* binding *BCL2*. Two primer sets SJ4158/SJ4159 and SJ4160/SJ4161 were used to quantitate *FLI1* in promoter and exon1 of *BCL2*. The primer set SJ4154/SJ4155 (5'Ctl) was used as the negative control. (B) *FLI1* in the *BCL2* promoter of U87MG cells (Left) and U251MG cells (Right). *FLI1* in the *BCL2* promoter were measured by ChIP assay. Normal mouse IgG was used as a negative control and was used for normalization. The data are the mean  $\pm$  SD from three independent experiments. \*\*\* $P < 0.001$  as compared with control cells (CTL). ns: Not statistically significant.

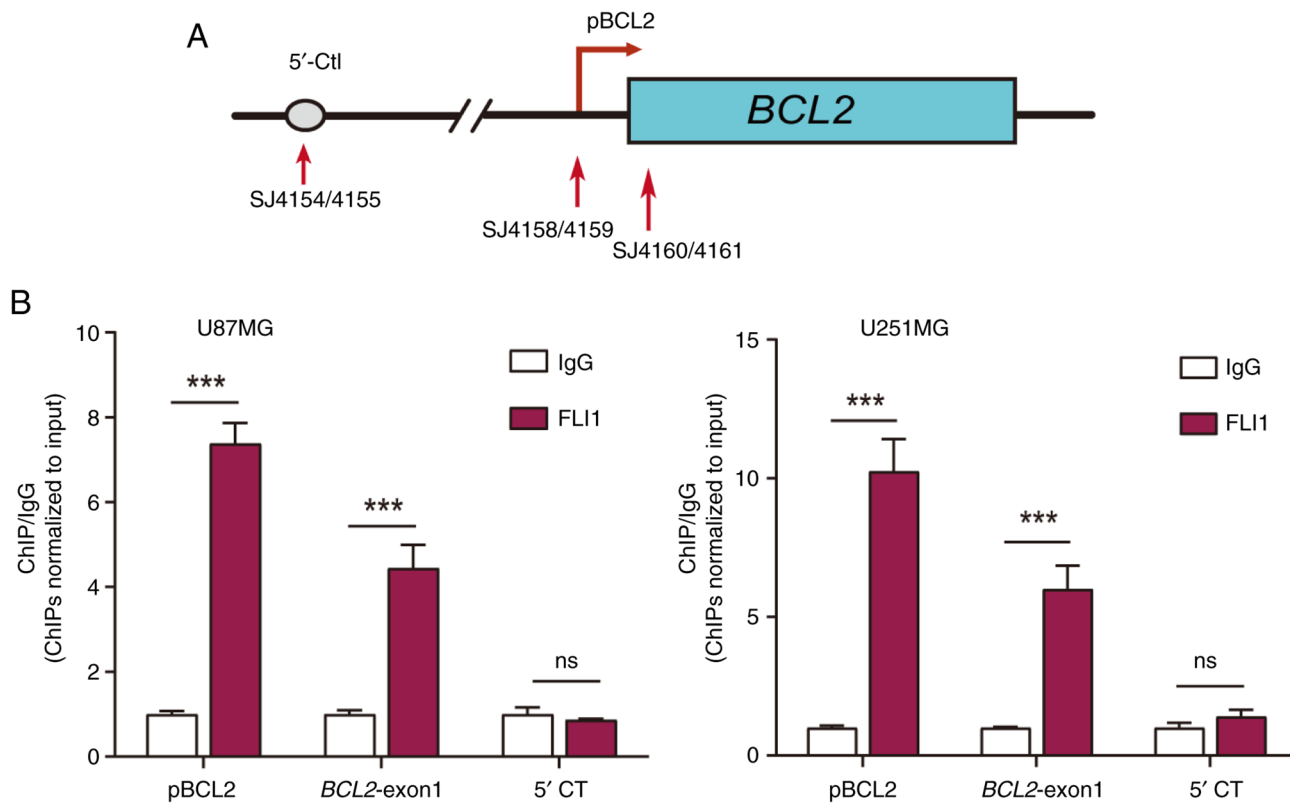

Figure S7. *FLII* overexpression induces DNA demethylation in the *ISG15* promoter. Alteration of DNA methylation at the *ISG15* site in U87MG cells. Numbers in parenthesis: Percentage of methylated CpGs. Note the demethylation status DNA methylation in OE FLII. OE, overexpression.

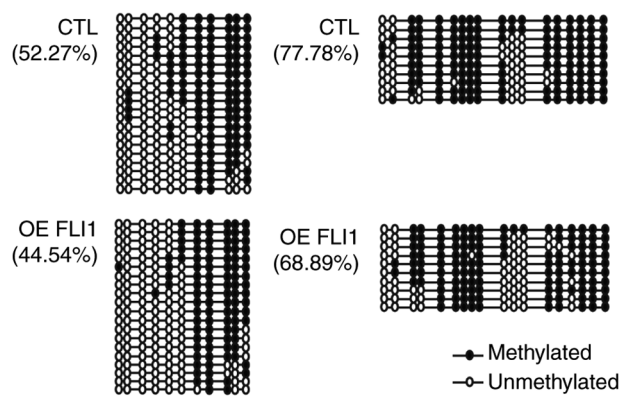

Supplement: Supplementary file [file downloadSupplementary]
